# Supplementary material
Source: HighWire-hosted journal article supplement (https://bmjopen.bmj.com/content/6/9/e012340)
Supplement: inline-supplementary-material-1 [file inline-supplementary-material-1.pdf]

| DOMAIN                  |                                 | DISEASE                                 |                 | ALL            | Cancer          | Chronic pulmonary disease | Chronic heart disease | Serious chronic liver disease | Serious chronic renal disease | Chronic neurological diseases | Dementia        | No advanced disease criteria |      |      |      |      |      |      |      |      |      |
|-------------------------|---------------------------------|-----------------------------------------|-----------------|----------------|-----------------|---------------------------|-----------------------|-------------------------------|-------------------------------|-------------------------------|-----------------|------------------------------|------|------|------|------|------|------|------|------|------|
|                         |                                 | n=782                                   |                 | n=76 (9.7%)    | n= 43 (5.5%)    | n= 63 (8.1%)              | n= 9 (1.1%)           | n= 11 (1.4%)                  | n=31 (4%)                     | n=172 (22%)                   | n=377 (48.2%)   |                              |      |      |      |      |      |      |      |      |      |
|                         |                                 | n                                       | %*              | n              | %*              | n                         | %*                    | n                             | %*                            | n                             | %*              | n                            | %*   |      |      |      |      |      |      |      |      |
|                         |                                 | v                                       | m               |                |                 |                           |                       |                               |                               |                               |                 |                              |      |      |      |      |      |      |      |      |      |
| FUNCTIONAL              | S (Barthel <25)                 | 147                                     |                 | 22.2           | 3               | 4.5                       | 0                     | 0                             | 6                             | 10.2                          | 0               | 0                            | 12   | 40   | 89   | 52.4 | 37   | 10.6 |      |      |      |
|                         |                                 | 662                                     | 120             |                |                 |                           |                       |                               |                               |                               |                 |                              |      |      |      |      |      |      |      |      |      |
|                         | S (Barthel average)             | 59.6 (+32.4)                            |                 | 79.9 (+/-24.9) | 75.38 (+/-21.9) | 71.44 (+/-28.5)           | 84.8 (+/-17.4)        | 74.4 (+/-15.1)                | 36.17 (+/-30)                 | 30.95 (+/-27.8)               | 67.05 (+/-27.9) |                              |      |      |      |      |      |      |      |      |      |
|                         |                                 | 731                                     | 51              |                |                 |                           |                       |                               |                               |                               |                 |                              |      |      |      |      |      |      |      |      |      |
| P (loss ≥2ADL's)        | 243                             |                                         | 31.5            | 33             | 43.4            | 11                        | 26.2                  | 19                            | 29.7                          | 4                             | 44.4            | 0                            | 0    | 14   | 45.2 | 49   | 29.2 | 109  | 29.4 |      |      |
|                         | 771                             | 11                                      |                 |                |                 |                           |                       |                               |                               |                               |                 |                              |      |      |      |      |      |      |      |      |      |
| P (clinical perception) | 343                             |                                         | 44.3            | 45             | 59.2            | 21                        | 48.8                  | 24                            | 36.9                          | 4                             | 44.4            | 7                            | 63.6 | 22   | 71   | 62   | 36.3 | 160  | 43   |      |      |
|                         | 774                             | 8                                       |                 |                |                 |                           |                       |                               |                               |                               |                 |                              |      |      |      |      |      |      |      |      |      |
| NUTRITIONAL             | S (albumin <2.5)                | 24                                      |                 | 5.8            | 5               | 8.1                       | 0                     | 0                             | 6                             | 66.7                          | 0               | 0                            | 0    | 0    | 1    | 2.8  | 13   | 5.9  |      |      |      |
|                         |                                 | 413                                     | 369             |                |                 |                           |                       |                               |                               |                               |                 |                              |      |      |      |      |      |      |      |      |      |
|                         | P (Weight loss > 10%)           | 42                                      |                 | 12.2           | 7               | 23.3                      | 2                     | 8.7                           | 2                             | 9.5                           | 2               | 33.3                         | 0    | 0    | 2    | 15.4 | 12   | 13   | 15   | 9.7  |      |
| 344                     |                                 | 438                                     |                 |                |                 |                           |                       |                               |                               |                               |                 |                              |      |      |      |      |      |      |      |      |      |
| P Clinical Perception   | 237                             |                                         | 30.7            | 48             | 63.2            | 8                         | 18.6                  | 14                            | 21.5                          | 4                             | 44.4            | 3                            | 27.3 | 6    | 19.4 | 57   | 33.5 | 97   | 26.3 |      |      |
|                         | 771                             | 11                                      |                 |                |                 |                           |                       |                               |                               |                               |                 |                              |      |      |      |      |      |      |      |      |      |
| COGNITIVE               | S (GDS/FAST ≥6c)                | 169                                     |                 | 21.9           | 0               | 0                         | 0                     | 0                             | 0                             | 0                             | 0               | 0                            | 0    | 0    | 169  | 98.3 | 0    | 0    |      |      |      |
|                         |                                 | 772                                     | 10              |                |                 |                           |                       |                               |                               |                               |                 |                              |      |      |      |      |      |      |      |      |      |
| P (loss ≥2ADL's)        | 68                              |                                         | 8.7             | na             | na              | na                        | na                    | na                            | na                            | na                            | na              | na                           | na   | na   | 68   | 39.5 | 0    | 0    |      |      |      |
|                         | 782                             | 0                                       |                 |                |                 |                           |                       |                               |                               |                               |                 |                              |      |      |      |      |      |      |      |      |      |
| EMOTIONAL               | Distress                        | 165                                     |                 | 21.9           | 20              | 24.7                      | 5                     | 11.9                          | 17                            | 26.6                          | 2               | 22.2                         | 4    | 36.4 | 11   | 36.7 | 22   | 12.9 | 84   | 23.8 |      |
|                         |                                 | 753                                     | 29              |                |                 |                           |                       |                               |                               |                               |                 |                              |      |      |      |      |      |      |      |      |      |
| GERIATRIC SYNDROMES     | Pressure ulcers                 | 34                                      |                 | 4.4            | 3               | 4                         | 1                     | 2.3                           | 0                             | 0                             | 0               | 0                            | 0    | 5    | 16.1 | 14   | 8.2  | 11   | 3    |      |      |
|                         |                                 | 773                                     | 9               |                |                 |                           |                       |                               |                               |                               |                 |                              |      |      |      |      |      |      |      |      |      |
|                         | Dysphagia                       | 81                                      |                 | 10.4           | 8               | 10.8                      | 2                     | 4.7                           | 2                             | 3.1                           | 0               | 0                            | 0    | 0    | 15   | 48.4 | 33   | 19.2 | 21   | 5.6  |      |
|                         |                                 | 779                                     | 3               |                |                 |                           |                       |                               |                               |                               |                 |                              |      |      |      |      |      |      |      |      |      |
|                         | Falls >2                        | 86                                      |                 | 11.2           | 7               | 9.5                       | 1                     | 2.3                           | 6                             | 9.4                           | 1               | 11.1                         | 1    | 9.1  | 5    | 16.1 | 21   | 12.3 | 44   | 12   |      |
|                         |                                 | 768                                     | 14              |                |                 |                           |                       |                               |                               |                               |                 |                              |      |      |      |      |      |      |      |      |      |
| Delirium                | 122                             |                                         | 15.7            | 10             | 13.2            | 4                         | 9.3                   | 8                             | 12.3                          | 3                             | 33.3            | 2                            | 18.2 | 6    | 19.4 | 32   | 18.6 | 57   | 15.3 |      |      |
|                         | 777                             | 5                                       |                 |                |                 |                           |                       |                               |                               |                               |                 |                              |      |      |      |      |      |      |      |      |      |
| Recurrent infections    | 41                              |                                         | 5.3             | 3              | 4               | 11                        | 25.6                  | 2                             | 3.1                           | 1                             | 11.1            | 0                            | 0    | 1    | 3.2  | 7    | 4.1  | 16   | 4.3  |      |      |
|                         | 774                             | 8                                       |                 |                |                 |                           |                       |                               |                               |                               |                 |                              |      |      |      |      |      |      |      |      |      |
| OTHERS                  | Comorbidity (Charlson mean)     | 3.23 (+/-2.9)                           |                 | 5.34 (+/-2.6)  | 2.81 (+/-1.7)   | 3.14 (+/-1.9)             | 5 (+/-2.8)            | 5.18 (+/-2.4)                 | 2.14 (+/-2.0)                 | 2.32 (+/-1.6)                 | 3.07 (+/-2.2)   |                              |      |      |      |      |      |      |      |      |      |
|                         |                                 | 683                                     | 99              |                |                 |                           |                       |                               |                               |                               |                 |                              |      |      |      |      |      |      |      |      |      |
|                         | Use of resources                | Unplanned admissions (average per year) | 0.55 (+/-1.0)   |                | 0.64 (+/-0.9)   | 1.09 (+/-1.1)             | 0.86 (+/-1.3)         | 1.89 (+/-1.6)                 | 0.73 (+/-0.9)                 | 0.24 (+/-0.6)                 | 0.21 (+/-0.4)   | 0.5 (+/-1.1)                 |      |      |      |      |      |      |      |      |      |
|                         |                                 |                                         | 686             | 96             |                 |                           |                       |                               |                               |                               |                 |                              |      |      |      |      |      |      |      |      |      |
|                         | Complex care                    | 145                                     |                 | 19.2           | 26              | 35.1                      | 12                    | 27.9                          | 8                             | 12.9                          | 2               | 22.2                         | 5    | 50   | 10   | 34.5 | 18   | 10.6 | 64   | 17.9 |      |
|                         |                                 | 755                                     | 27              |                |                 |                           |                       |                               |                               |                               |                 |                              |      |      |      |      |      |      |      |      |      |
|                         | Palliative care approach        | Choice/dem and patient                  | 44              |                | 5.6             | 13                        | 17.1                  | 2                             | 4.7                           | 5                             | 7.7             | 0                            | 0    | 4    | 36.4 | 2    | 6.4  | 1    | 0.6  | 21   | 5.6  |
|                         |                                 |                                         | 786             | 6              |                 |                           |                       |                               |                               |                               |                 |                              |      |      |      |      |      |      |      |      |      |
|                         | Need (Healthcare professionals) | Choice/dem and family                   | 209             |                | 26.7            | 30                        | 39.5                  | 11                            | 25.6                          | 13                            | 20              | 2                            | 22.2 | 0    | 0    | 5    | 16.2 | 64   | 37.3 | 80   | 21.5 |
|                         |                                 |                                         | 782             | 0              |                 |                           |                       |                               |                               |                               |                 |                              |      |      |      |      |      |      |      |      |      |
|                         | Age (mean)                      | 121                                     |                 | 15.5           | 36              | 47.4                      | 7                     | 16.3                          | 10                            | 15.6                          | 3               | 33.3                         | 1    | 10   | 4    | 12.9 | 23   | 13.5 | 37   | 10   |      |
| 776                     |                                 | 6                                       |                 |                |                 |                           |                       |                               |                               |                               |                 |                              |      |      |      |      |      |      |      |      |      |
| Sex                     | 80.89 (+/-11.9)                 |                                         | 79.92 (+/-24.0) | 79.09 (+/-9.9) | 78.25 (+/-14.4) | 67.56 (+/-16.0)           | 76.45 (+/-13.4)       | 71.74 (+/-15.6)               | 85.01 (+/-6.5)                | 82.62 (+/-11.3)               |                 |                              |      |      |      |      |      |      |      |      |      |
|                         | 782                             | 0                                       |                 |                |                 |                           |                       |                               |                               |                               |                 |                              |      |      |      |      |      |      |      |      |      |
|                         | Male                            | 301                                     |                 | 38.5           | 44              | 57.9                      | 31                    | 72.1                          | 26                            | 40                            | 6               | 66.7                         | 5    | 45.5 | 16   | 51.6 | 34   | 19.8 | 141  | 37.4 |      |
|                         |                                 | 782                                     | 0               |                |                 |                           |                       |                               |                               |                               |                 |                              |      |      |      |      |      |      |      |      |      |
| Women                   | 481                             |                                         | 61.5            | 32             | 42.1            | 12                        | 27.9                  | 39                            | 60                            | 3                             | 33.3            | 6                            | 54.5 | 15   | 48.4 | 138  | 80.2 | 236  | 62.6 |      |      |
|                         | 782                             | 0                                       |                 |                |                 |                           |                       |                               |                               |                               |                 |                              |      |      |      |      |      |      |      |      |      |

**Distribution of variables according to presence of disease severity and/or progression criteria; %:** percentage of patients with presence of the analysed variable with respect to the total of patients. **ADL:** activities of daily living. **IADL:** instrumental activities of daily living. **GDS/FAST:** Global Deterioration Scale / Functional Assessment Staging **m:** missing patients. **n:** number of valid patients for evaluation of variable. **na:** not applicable. **v:** % valid patients
